# Supplementary material for: A Cost-Effective Method for Preparing Robust and Conductive Superhydrophobic Coatings Based on Asphalt
Source: Hindawi journal article supplement (doi:10.1155/2020/5642124), 2020-12-24

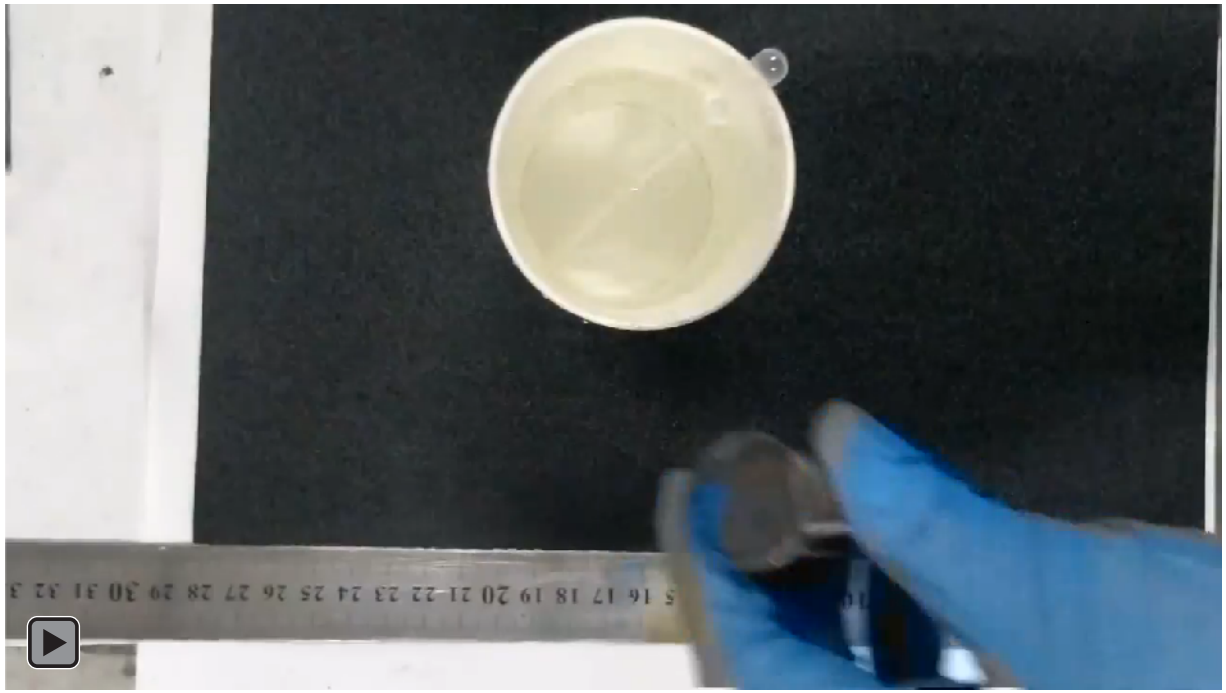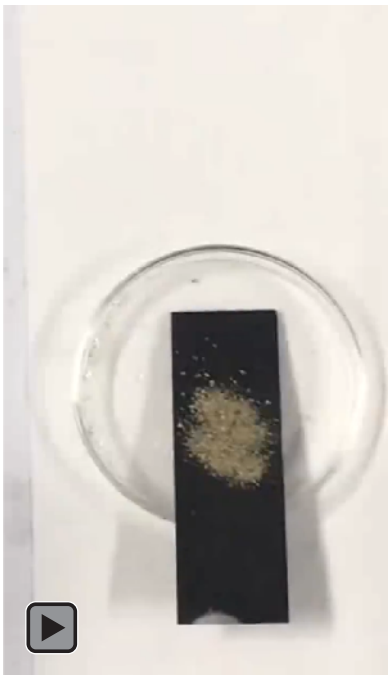

Supplement: f1 [file 5642124.f1.pdf]
